# Supplementary material for: Bio-Based Solvents for Green Extraction of Lipids from Oleaginous Yeast Biomass for Sustainable Aviation Biofuel
Source: PubMed Central journal article supplement (PMC6274296; doi:10.3390/molecules21020196), 2016-02-06
Supplement: molecules-21-00196-s001.pdf [file molecules-21-00196-s001.pdf]

# Supplementary Materials: Bio-Based Solvents for Green Extraction of Lipids from Oleaginous Yeast Biomass for Sustainable Aviation Biofuel

Cassandra Breil, Alice Meullemiestre, Maryline Vian and Farid Chemat

**Table S1.** The aim is to see the difference of the solubilization of major molecules present in yeast with different solvents. The relative energy difference (RED) values of agro-solvents for the extraction allows one to have the prediction of the solubilization of major compounds.

| Solvents      | $\partial D$ | $\partial P$ | $\partial H$ | TAG 1 | TAG 2 | TAG 3 | TAG 4 | TAG 5 | TAG 6 | TAG 7 | DAG 1 | DAG 2 | DAG 3 | FFA 1 | FFA 2 | FFA 3 | PE 1 | PE 2 | PE 3 | PE 4 | PC 1 | PC 2 | PC 3 | PC 4 |
|---------------|--------------|--------------|--------------|-------|-------|-------|-------|-------|-------|-------|-------|-------|-------|-------|-------|-------|------|------|------|------|------|------|------|------|
| Hexane        | 14           | 0            | 0            | 1.1   | 1.14  | 1.13  | 1.17  | 1.11  | 1.07  | 1.1   | 1.85  | 1.84  | 1.89  | 1.86  | 1.82  | 2     | 3.05 | 2.97 | 2.89 | 2.93 | 2.74 | 2.72 | 2.7  | 2.73 |
| DMC           | 15.5         | 8.6          | 9.7          | 2.61  | 2.55  | 2.51  | 2.46  | 2.53  | 2.58  | 2.48  | 1.61  | 1.64  | 1.67  | 1.64  | 1.75  | 1.72  | 0.69 | 0.68 | 0.71 | 0.64 | 1.06 | 0.97 | 0.89 | 0.84 |
| Ethyl Acetate | 15.8         | 5.3          | 7.2          | 1.59  | 1.53  | 1.48  | 1.43  | 1.51  | 1.56  | 1.46  | 0.58  | 0.6   | 0.64  | 0.61  | 0.73  | 0.75  | 0.8  | 0.71 | 0.63 | 0.66 | 0.66 | 0.57 | 0.49 | 0.5  |
| Ethyl Lactate | 16           | 7.6          | 12.5         | 2.97  | 2.92  | 2.87  | 2.82  | 2.9   | 2.96  | 2.85  | 1.9   | 1.92  | 1.92  | 1.94  | 2.04  | 1.95  | 0.73 | 0.8  | 0.88 | 0.83 | 1.05 | 1.04 | 1.04 | 1    |
| p-Cymene      | 17.3         | 2.3          | 2.4          | 0.39  | 0.38  | 0.43  | 0.44  | 0.42  | 0.43  | 0.47  | 1.19  | 1.15  | 1.11  | 1.07  | 0.94  | 1.01  | 2.2  | 2.13 | 2.06 | 2.11 | 1.05 | 1.93 | 1.9  | 1.95 |
| Limonene      | 16.7         | 1.8          | 3.1          | 0.59  | 0.54  | 0.53  | 0.49  | 0.57  | 0.61  | 0.57  | 0.86  | 0.81  | 0.75  | 0.74  | 0.61  | 0.64  | 1.87 | 1.81 | 1.74 | 1.8  | 1.58 | 1.57 | 1.56 | 1.61 |
| a-Pinene      | 16.4         | 1.3          | 2.2          | 0.13  | 0.16  | 0.17  | 0.22  | 0.15  | 0.11  | 0.18  | 1.15  | 1.12  | 1.12  | 1.09  | 1     | 1.14  | 2.32 | 2.25 | 2.17 | 2.22 | 2.03 | 2    | 1.99 | 2.03 |
| MeTHF         | 16.4         | 4.7          | 4.6          | 1     | 0.95  | 0.94  | 0.9   | 0.94  | 0.99  | 0.93  | 0.81  | 0.77  | 0.75  | 0.66  | 0.6   | 0.64  | 1.47 | 1.4  | 1.33 | 1.37 | 1.37 | 1.3  | 1.23 | 1.27 |
| CPME          | 16.7         | 4.3          | 4.3          | 0.84  | 0.79  | 0.77  | 0.72  | 0.78  | 0.83  | 0.76  | 0.67  | 0.63  | 0.62  | 0.52  | 0.46  | 0.54  | 1.51 | 1.44 | 1.36 | 1.41 | 1.35 | 1.29 | 1.23 | 1.27 |
| IPA           | 15.8         | 6.1          | 16.4         | 3.72  | 3.67  | 3.61  | 3.56  | 3.65  | 3.71  | 3.6   | 2.63  | 2.66  | 2.65  | 2.7   | 2.79  | 2.69  | 1.66 | 1.72 | 1.79 | 1.76 | 1.75 | 1.81 | 1.87 | 1.84 |
| Ethanol       | 15.8         | 8.8          | 19.4         | 4.66  | 4.6   | 4.55  | 4.49  | 4.59  | 4.64  | 4.54  | 3.56  | 3.59  | 3.58  | 3.62  | 3.72  | 3.61  | 2.46 | 2.53 | 2.61 | 2.57 | 2.67 | 2.71 | 2.74 | 2.71 |

RED > 1      RED < 1

**Triglycerides:** TAG 1 (R1: C18:2n-6, R2: C18:2n6, R3: C16), TAG 2 (R1: C18:2n-6, R2: C18:2n6, R3: C18:2n-6), TAG 3 (R1: C18:2n-6, R2: C18:1n9, R3: C16), TAG 4 (R1: C18:1n9, R2: C18:1n9, R3: C18:1n9), TAG 5 (R1: C18:1n9, R2: C18:2n-6, R3: C18:2n6), TAG 6 (R1: C18:1n-9, R2: C18:1n9, R3: C16), TAG 7 (R1: C18:2n6, R2: C18:1n-9, R3: C18:1n9).

**Diglycerides:** DAG 1 (R1: C18:2n6, R2: C18:2n6), DAG 2 (R1: C18:2n6, R2: C18:1n9), DAG 3 (R1: C18:1n9, R2: C18:1n9).

**Free Fatty Acids:** FFA 1 (R1: C16), FFA 2 (R1: C18:2n6), FFA 3 (R1: C18:2n6).

**Phosphatidylethanolamine:** PE 1 (R1: C18:2n-6, R2: C18:2n6), PE 2 (R1: C18:1n9, R2: C18:2n-6), PE 3 (R1: C18:1n9, R2: C18:1n9), PE 4 (R1: C16, R2: C18:1n9).

**Phosphatidylcholine:** PC 1 (R1: C18:2n-6, R2: C18:2n6), PC 2 (R1: C18:1n9, R2: C18:2n-6), PC 3 (R1: C18:1n9, R2: C18:1n9), PC 4 (R1: C16, R2: C18:1n9).

**Table S2.** The aim is to show the difference of the solubilization of major molecules present in yeast with different solvents. COSMO-RS prediction results regarding the solubility of the major components of *Yarrowia lipolytica* oil in several solvents.

| Solvent          | TAG 1 | TAG 2 | TAG 3 | TAG 4 | TAG 5 | TAG 6 | TAG 7 | DAG 1 | DAG 2 | DAG 3 | FFA 1 | FFA 2 | FFA 3 | PE 1  | PE 2  | PE 3   | PE 4  | PC 1  | PC 2  | PC 3  | PC 4  |
|------------------|-------|-------|-------|-------|-------|-------|-------|-------|-------|-------|-------|-------|-------|-------|-------|--------|-------|-------|-------|-------|-------|
| Hexane           | 0     | -0.03 | -0.02 | 0     | 0     | 0     | 0     | -1.66 | -1.46 | -1.18 | -1.29 | -1.36 | -1.33 | -5.27 | -4.46 | -4.03  | -4.51 | -5.31 | -6.52 | -4.53 | -5.23 |
| DMC              | -1.46 | -1.71 | -1.36 | -1.46 | -1.62 | -2.28 | -1.42 | -0.34 | -0.38 | -0.34 | -0.53 | -0.49 | -0.19 | -1.17 | -0.79 | -1.58  | -1.28 | 0     | -0.01 | 0     | 0     |
| Ethyl Acetate    | 0     | 0     | 0     | 0     | 0     | -0.24 | 0     | 0     | 0     | 0     | 0     | 0     | 0     | 0     | 0     | 0      | -0.19 | 0     | 0     | 0     | 0     |
| Ethyl Lactate    | -3.26 | -2.74 | -3.15 | -3.23 | -3.52 | -3.99 | -3.24 | -1.07 | -1.87 | -1.53 | -0.22 | -0.27 | -0.06 | -0.63 | -0.56 | -1.04  | -1.08 | 0     | 0     | 0     | 0     |
| p-Cymene         | 0     | 0     | 0     | 0     | 0     | 0     | 0     | -0.83 | -0.88 | -0.74 | -1.03 | -1.03 | -0.91 | -3.65 | -2.92 | -3.05  | -3.35 | -2.51 | -3.41 | -2.1  | -2.6  |
| Limonene         | 0     | 0     | 0     | 0     | 0     | 0     | 0     | -0.88 | -0.73 | -0.79 | -0.96 | -0.98 | -0.89 | -3.81 | -3.09 | -3.07  | -3.4  | -3.01 | -3.97 | -2.49 | -3.05 |
| $\alpha$ -Pinene | 0     | 0     | 0     | 0     | 0     | 0     | 0     | -1.11 | -0.96 | -0.86 | -1.08 | -1.11 | -1.03 | -4.24 | -3.48 | -3.39  | -3.75 | -3.54 | -4.55 | -2.98 | -3.56 |
| MeTHF            | 0     | 0     | 0     | 0     | 0     | 0     | 0     | 0     | 0     | 0     | 0     | 0     | 0     | 0     | 0     | 0      | 0     | 0     | 0     | 0     | 0     |
| CPME             | 0     | 0     | 0     | 0     | 0     | 0     | 0     | 0     | 0     | 0     | 0     | 0     | 0     | 0     | 0     | 0      | 0     | -0.93 | -1.56 | -0.95 | -0.97 |
| IPA              | -1.67 | -1.43 | -1.56 | -1.52 | -1.77 | -2.04 | -1.55 | -0.24 | -0.22 | -0.36 | 0     | 0     | 0     | 0     | 0     | -0.025 | -0.1  | 0     | 0     | 0     | 0     |
| Ethanol          | -2.57 | -2.23 | -2.46 | -2.46 | -2.72 | -3.08 | -2.45 | -0.72 | -0.76 | -0.97 | 0     | -0.03 | 0     | -0.19 | -0.19 | -0.4   | -0.52 | 0     | 0     | 0     | 0     |

■ 0      ■  $-0.1 \leq x \leq -0.99$       ■  $-1 \leq x \leq -5$

**Triglycerides:** TAG 1 (R1: C18:2n-6, R2: C18:2n6, R3: C16), TAG 2 ( R1: C18:2n-6, R2: C18:2n6, R3: C18:2n-6), TAG 3 (R1: C18:2n-6, R2: C18:1n9, R3: C16), TAG 4 (R1: C18:1n9, R2: C18:1n9, R3: C18:1n9), TAG 5 (R1: C18:1n9, R2: C18:2n-6, R3: C18:2n6), TAG 6 (R1: C18:1n-9, R2: C18:1n9, R3: C16), TAG 7 (R1: C18:2n6, R2: C18:1n-9, R3: C18:1n9).

**Diglycerides:** DAG 1 (R1: C18:2n6, R2: C18:2n6), DAG 2 (R1: C18:2n6, R2: C18:1n9), DAG 3 (R1: C18:1n9, R2: C18:1n9).

**Free Fatty Acids:** FFA 1 (R1: C16), FFA 2 (R1: C18:2n6), FFA 3 (R1: C18:2n6).

**Phosphatidylethanolamine:** PE 1 (R1: C18:2n-6, R2: C18:2n6), PE 2 (R1: C18:1n9, R2: C18:2n-6), PE 3 (R1: C18:1n9, R2: C18:1n9), PE 4 (R1: C16, R2: C18:1n9).

**Phosphatidylcholine:** PC 1 (R1: C18:2n-6, R2: C18:2n6), PC 2 (R1: C18:1n9, R2: C18:2n-6), PC 3 (R1: C18:1n9, R2: C18:1n9), PC 4 (R1: C16, R2: C18:1n9).
